# Supplementary material for: Carbapenem-Resistant Enterobacteriaceae in Children, United States, 1999–2012
Source: Emerg Infect Dis. 2015 Nov;21(11):2014–21. doi: 10.3201/eid2111.150548 (PMC4622248; doi:10.3201/eid2111.150548)
Supplement: Supplementary file 1 — Technical Appendix. Additional information on carbapenem-resistant Enterobacteriaceae in children, United States, 1999–2012. [file 15-0548-Techapp-s1.pdf]

# Carbapenem-Resistant *Enterobacteriaceae* in Children, United States, 1999–2012

## Technical Appendix

**Technical Appendix Table 1.** Two-year CRE isolate counts by species, the Surveillance Network–USA database, 1999–2012\*

| Organism                     | 1999–2000 | 2001–2002 | 2003–2004 | 2005–2006 | 2007–2008 | 2009–2010 | 2011–2012 |
|------------------------------|-----------|-----------|-----------|-----------|-----------|-----------|-----------|
| <i>Enterobacter</i> species† | 0         | 1         | 6         | 2         | 20        | 23        | 46        |
| <i>Escherichia coli</i>      | 0         | 0         | 1         | 1         | 12        | 16        | 28        |
| <i>Klebsiella pneumoniae</i> | 0         | 0         | 5         | 4         | 14        | 35        | 25        |
| <i>Serratia marcescens</i>   | 0         | 0         | 0         | 0         | 3         | 3         | 11        |
| <i>Citrobacter</i> species‡  | 0         | 0         | 0         | 0         | 0         | 5         | 3         |
| <i>Proteus mirabilis</i>     | 0         | 0         | 0         | 0         | 0         | 0         | 2         |

\*CRE, carbapenem-resistant *Enterobacteriaceae*. CRE is defined as resistance to all tested third-generation cephalosporins (ceftriaxone, cefotaxime, or ceftazidime), and nonsusceptibility to  $\geq 1$  carbapenem (ertapenem, imipenem, meropenem, or doripenem). For bacteria with intrinsic imipenem nonsusceptibility (*P. mirabilis*), the CRE criteria required nonsusceptibility to  $\geq 2$  of the carbapenems listed.

†*E. aerogenes* and *E. cloacae*.

‡*C. freundii* and *C. koseri*.

**Technical Appendix Table 2.** Characteristics of *Enterobacteriaceae* isolates and children >1 year of age from which they were isolated, The Surveillance Network–USA database, 1999–2012\*

| Characteristic               | No. (%) isolates tested, n = 8,319 | No. (%) CRE isolates tested, n = 70 | No. CRE/no. tested, %, 70/8,319 (0.84%) |
|------------------------------|------------------------------------|-------------------------------------|-----------------------------------------|
| Organism                     |                                    |                                     |                                         |
| <i>Escherichia coli</i>      | 4,733 (56.89)                      | 4 (5.71)                            | 0.08                                    |
| <i>Klebsiella pneumoniae</i> | 1,302 (15.65)                      | 17 (24.29)                          | 1.31                                    |
| <i>Enterobacter</i> species† | 1,298 (15.60)                      | 41 (58.57)                          | 3.16                                    |
| <i>Serratia marcescens</i>   | 448 (5.39)                         | 4 (5.71)                            | 0.89                                    |
| <i>Citrobacter</i> species‡  | 274 (3.29)                         | 4 (5.71)                            | 1.46                                    |
| <i>Proteus mirabilis</i>     | 264 (3.17)                         | 0                                   | 0.00                                    |
| Health care setting          |                                    |                                     |                                         |
| Outpatient                   | 3,869 (46.51)                      | 17 (24.29)                          | 0.44                                    |
| Inpatient                    | 2,543 (30.57)                      | 27 (38.57)                          | 1.06                                    |
| Inpatient–ICU                | 1,887 (22.68)                      | 26 (37.14)                          | 1.38                                    |
| Nursing home                 | 12 (0.14)                          | 0                                   | 0.00                                    |
| Unknown                      | 8 (0.10)                           | 0                                   | 0.00                                    |
| Isolate source               |                                    |                                     |                                         |
| Urine                        | 4,860 (58.42)                      | 32 (45.71)                          | 0.66                                    |
| Lower respiratory tract      | 1,673 (20.11)                      | 30 (42.86)                          | 1.79                                    |
| Wound                        | 921 (11.07)                        | 7 (10.00)                           | 0.76                                    |
| Blood                        | 548 (6.59)                         | 1 (1.43)                            | 0.18                                    |
| Other§                       | 317 (3.81)                         | 0                                   | 0.00                                    |
| Sex                          |                                    |                                     |                                         |
| F                            | 4,197 (50.45)                      | 28 (40.00)                          | 0.67                                    |
| M                            | 4,106 (49.36)                      | 42 (60.00)                          | 1.02                                    |
| Unknown                      | 16 (0.19)                          | 0                                   | 0.00                                    |
| Region                       |                                    |                                     |                                         |
| South Atlantic               | 2,754 (33.10)                      | 21 (30.00)                          | 0.76                                    |
| West                         | 2,015 (24.22)                      | 14 (20.00)                          | 0.69                                    |
| South Central                | 1,228 (14.76)                      | 7 (10.00)                           | 0.57                                    |
| West North Central           | 966 (11.61)                        | 11 (15.71)                          | 1.14                                    |
| East North Central           | 755 (9.08)                         | 16 (22.86)                          | 2.12                                    |
| North East                   | 601 (7.22)                         | 1 (1.43)                            | 0.17                                    |

\*CRE, carbapenem-resistant *Enterobacteriaceae*. CRE is defined as resistance to all tested third-generation cephalosporins (ceftriaxone, cefotaxime, or ceftazidime), and nonsusceptibility to  $\geq 1$  carbapenem (ertapenem, imipenem, meropenem, or doripenem). For bacteria with intrinsic imipenem nonsusceptibility (*P. mirabilis*), the CRE criteria required nonsusceptibility to  $\geq 2$  of the carbapenems listed. ICU, intensive care unit.

†Isolates were tested against  $\geq 1$  third-generation cephalosporin and  $\geq 1$  carbapenem of those considered for the CRE phenotype.

‡*E. aerogenes* and *E. cloacae*.

§*C. freundii* and *C. koseri*.

§Includes upper respiratory tract and skin cultures.

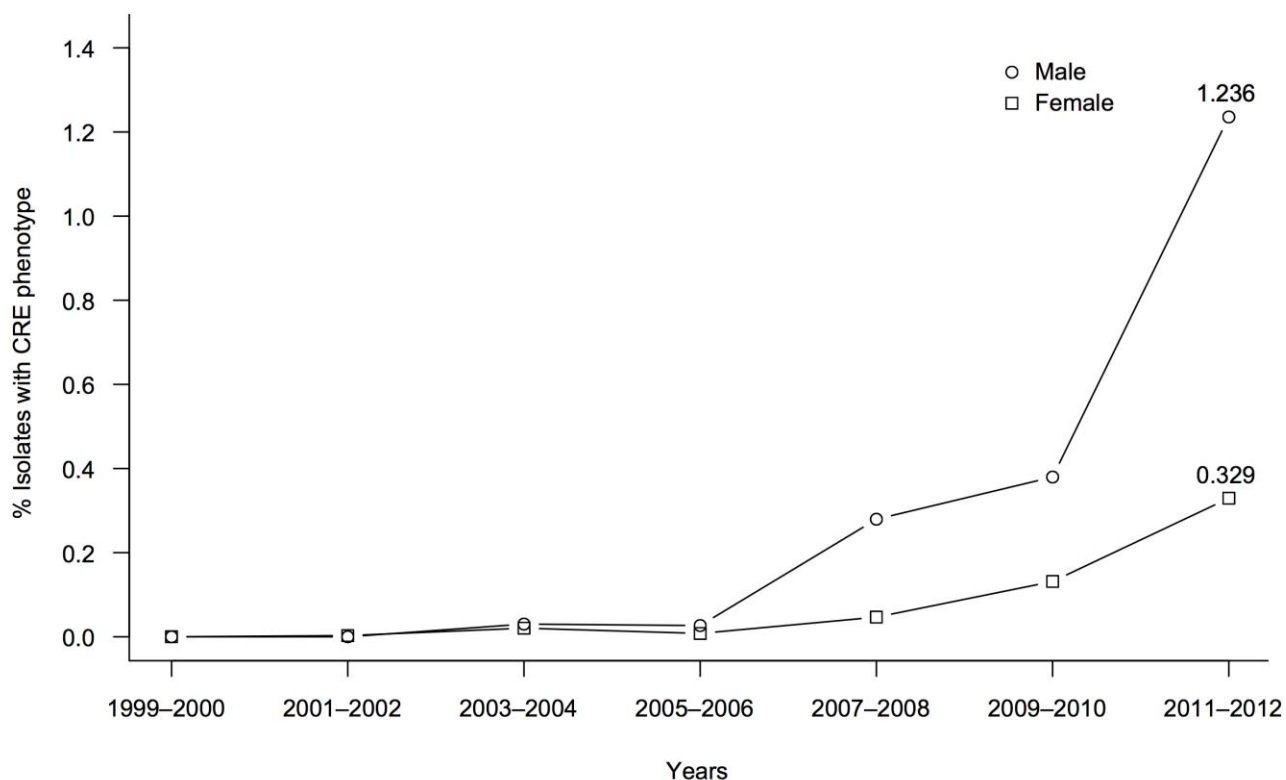

**Technical Appendix Figure 1.** Patient sex and national trends in prevalence of third-generation cephalosporin- and carbapenem-resistant *Enterobacteriaceae* (CRE) isolates from children, The Surveillance Network–USA database, 1999–2012. Data for patients <1 year of age were not available for all years and were excluded from analysis. There was a significant positive quadratic trend for male patients ( $p = 3.4 \times 10^{-19}$ ) and female patients ( $p = 2.5 \times 10^{-25}$ ).

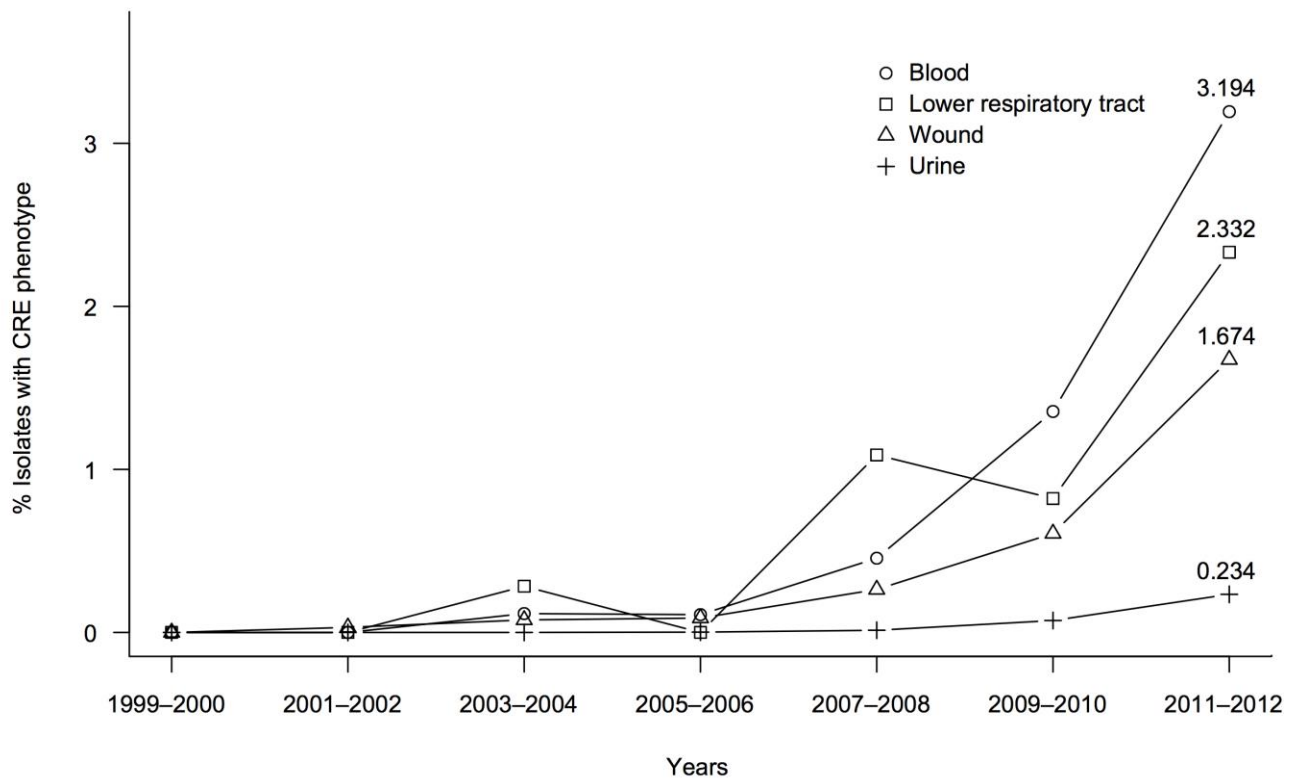

**Technical Appendix Figure 2.** Isolate source and national trends in prevalence of third-generation cephalosporin– and carbapenem-resistant *Enterobacteriaceae* (CRE) isolates from children, The Surveillance Network–USA database, 1999–2012. Data for patients <1 year of age were not available for all years and were excluded from analysis. There was a positive quadratic trend for urine ( $p = 3.1 \times 10^{-29}$ ), blood ( $p = 2.0 \times 10^{-10}$ ), wound ( $p = 1.1 \times 10^{-11}$ ), and lower respiratory tract ( $p = 7.4 \times 10^{-6}$ ).

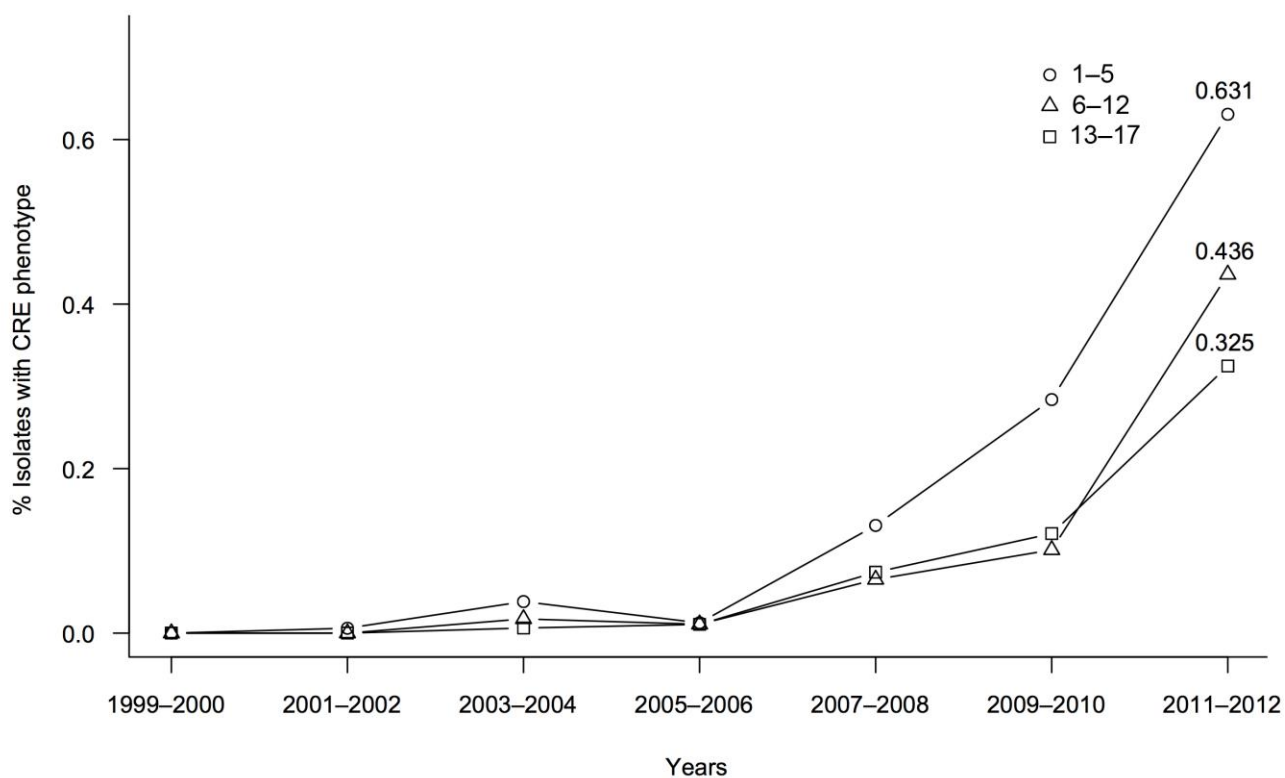

**Technical Appendix Figure 3.** Age group and national trends in prevalence of third-generation cephalosporin– and carbapenem-resistant *Enterobacteriaceae* (CRE) isolates from children, The Surveillance Network–USA database, 1999–2012. Data for patients <1 year of age were not available for all years and were excluded from analysis. There was a significant positive quadratic trend for ages 1–5 ( $p = 1.3 \times 10^{-20}$ ), 6–12 ( $p = 1.2 \times 10^{-14}$ ), and 13–17 years ( $p = 1.8 \times 10^{-9}$ ).
